# Supplementary material
Source: PubMed Central journal article supplement (PMC10248605)
Supplement: 11032_2021_1273_MOESM1_ESM.pdf [file 11032_2021_1273_MOESM1_ESM.pdf]

**Knockdown of *OsNRT2.4* modulates root morphology and alters nitrogen metabolism in response to low nitrate availability in rice**

Andressa Fabiane Faria de Souza<sup>1</sup> • Carlos Alberto Bucher<sup>1</sup> • Leilson Novaes Arruda<sup>1</sup> • Rafael Passos Rangel<sup>1</sup> • Leandro Azevedo Santos<sup>1</sup> • Manlio Silvestre Fernandes<sup>1</sup> • Sonia Regina de Souza<sup>2</sup>

**Affiliations**

<sup>1</sup>Department of Soil, Plant Nutrition Group, Federal Rural University of Rio de Janeiro (UFRRJ), Rodovia BR 465 km 7, 23890-000 Seropédica, RJ, Brazil

<sup>2</sup>Department of Chemistry, Plant Biochemistry Group, Federal Rural University of Rio de Janeiro (UFRRJ), Rodovia BR 465 km 7, 23890-000 Seropédica, RJ, Brazil

**Corresponding author**

Correspondence to Andressa Fabiane Faria de Souza: andressasouza@ufrj.br

Online Resource 1. Sequences of primers designed by Web MicroRNA Designer platform (WMD) (<http://wmd3.weigelworld.org/>) containing amiRNA plant expression vector gene *OsNRT2.4* (LOC\_Os01g36720).

| Gene              | Primer    | Sequence                                        |
|-------------------|-----------|-------------------------------------------------|
| <i>OsNRT2.4mi</i> | I MIR-s   | 5'-agTTTTGCAGACGAAAGGAACGTcaggagattcagttga-3'   |
|                   | II MIR-a  | 5'-tgACGTTCTTCGTCTGCAAAAActgctgctgctacagcc-3'   |
|                   | III MIR*s | 5'-ctACGTTGCTTACGTCTGCAAAAAttctgctgctagtgctg-3' |
|                   | IV MIR*a  | 5'-aaTTTTGCAGACGTAAGCAACGTtagagaggcaaaagtga-3'  |

**Nota:** Universal primer sequence G-4368: 5'-CTG CAA GGC GAT TAA GTT GGG TAA C-3', G-4369: 5'-GCG GAT AAC AAT TTC ACA CAG GAA ACA G-3'.

Online Resource 2. Sequences of forward and reverse primers used in semiquantitative real-time RT-PCR analysis for genes involved in nitrogen metabolic pathway. *OsUBC* (Ubiquitin – conjugating enzyme – E2) and *OseEF-1a* (1 $\alpha$  elongation factor) were used as housekeeping genes.

| Gene            | Primer Forward                | Primer Reverse                 | TIGR           |
|-----------------|-------------------------------|--------------------------------|----------------|
| <i>OsNRT2.4</i> | 5'-ACGAAGCTGGTGAAGAAGAAG-3'   | 5'-ACGACGCCATCGCCATA-3'        | LOC_Os01g36720 |
| <i>OsNRT2.1</i> | 5'-GCGACCGAGACCAGCAATAC-3'    | 5'-TTCATCACCGTTTGCAACAAG-3'    | LOC_Os02g02170 |
| <i>OsNAR2.1</i> | 5'-AAGACGCAGGTGTTCTCTCC-3'    | 5'-ACTTCACCGTGCTGGGC-3'        | LOC_Os02g38230 |
| <i>OsGS1;1</i>  | 5'-CCGAGTCGTCGTCATTT-3'       | 5'-GAGCTTCTCAATGGCGGACT-3'     | LOC_Os02g50240 |
| <i>OsGS2</i>    | 5'-AGGCGAAGGGAAAAGGCTAC-3'    | 5'-GAGGGTTGGCTCCCAAAGAA-3'     | LOC_Os04g56400 |
| <i>OsNIA1</i>   | 5'-CTACATCGACGTCAAGGGGC-3'    | 5'-TGGATGACCTGGTACATGGG-3'     | LOC_Os08g36500 |
| <i>OsUBC</i>    | 5'-CCGTTTGTAGAGCCATAATTGCA-3' | 5'-AGGTTGCCTGAGTCACAGTTAAGT-3' | LOC_Os02g42314 |
| <i>eEF-1a</i>   | 5'-CTCTTGGTCGTTTTGCCGTG-3'    | 5'-TGCAGATATGAAAGCACCCT-3'     | LOC_03g08020   |
